# Supplementary material
Source: PubMed Central journal article supplement (PMC10773962)
Supplement: NIHMS1952379-supplement-Schendel_et_al__supplementary_materials.pdf [file NIHMS1952379-supplement-Schendel_et_al__supplementary_materials.pdf]

## Supplementary Material

Stimulus Duration Adjustment (Staircase Procedure):

The procedure was designed such that initial adjustments to stimulus presentation time get progressively finer as the trials continue. The adjustment size ( $\delta T$ ) was formally defined as:

$$\delta T = [6 - ([r+1] - \text{mod}[(r+1), 2]) / 2] * 16.6,$$

where  $\delta T$  = the adjustment size in milliseconds, and  $r$  = the number of reversals (see List et al., 2008).

The adjustment time ( $\delta T$ ) was then multiplied by the corresponding ratio, according to the participant's response on each trial (hits \*-1, misses \*+3, false alarms \*+4, and correct rejections \*0).
